# Supplementary material
Source: Springer Nature journal article supplement (https://www.springermedizin.de/resource/supplementary/12985_2006_139_MOESM4_ESM.pdf/9607344)

RSV

FP

SAL

FPS

OVA

ICAM-1

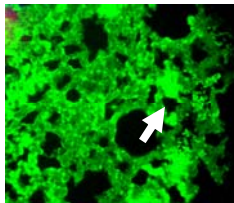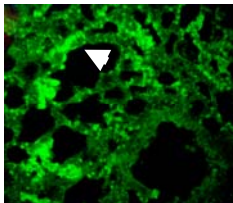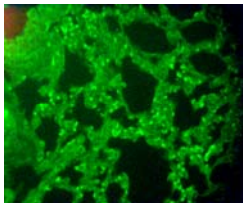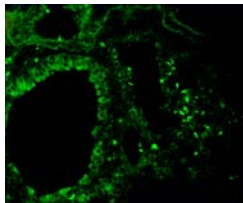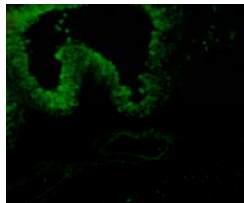

MUC-5A

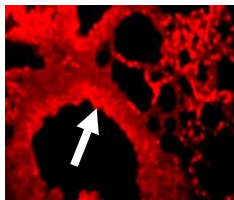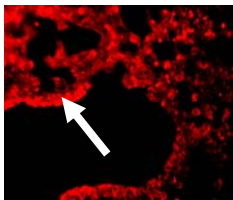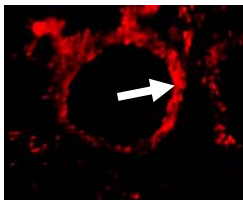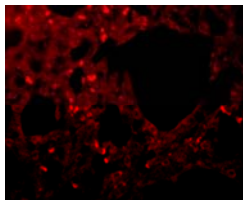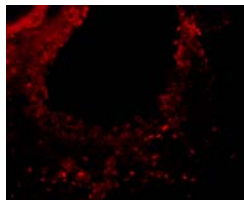

T1/ST-2

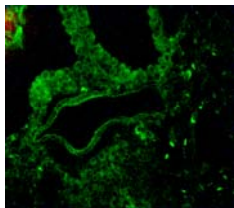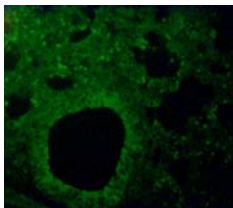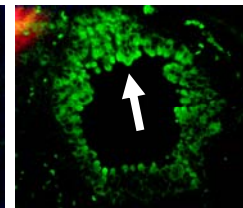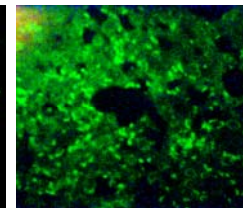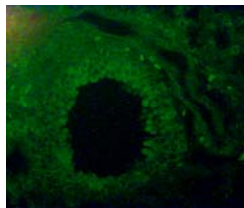

Supplement: MOESM4 [file 9607344]
